# Supplementary material for: Mass Spectrometric Identification of Licania rigida Benth Leaf Extracts and Evaluation of Their Therapeutic Effects on Lipopolysaccharide-Induced Inflammatory Response
Source: MDPI journal article supplement (doi:10.3390/molecules27196291), 2022-09-23

## Supplementary material

**Figure S1.** Comparison between library GNPS and query spectra of phytocomponents identified in *Licania rigida Benth* by LC-MS/MS analyses.

Comparison between library GNPS (bottom) and query spectra phytocomponents identified in **AELR** (top). The structure of the phytocomponent identified is represented.

### Gallic acid

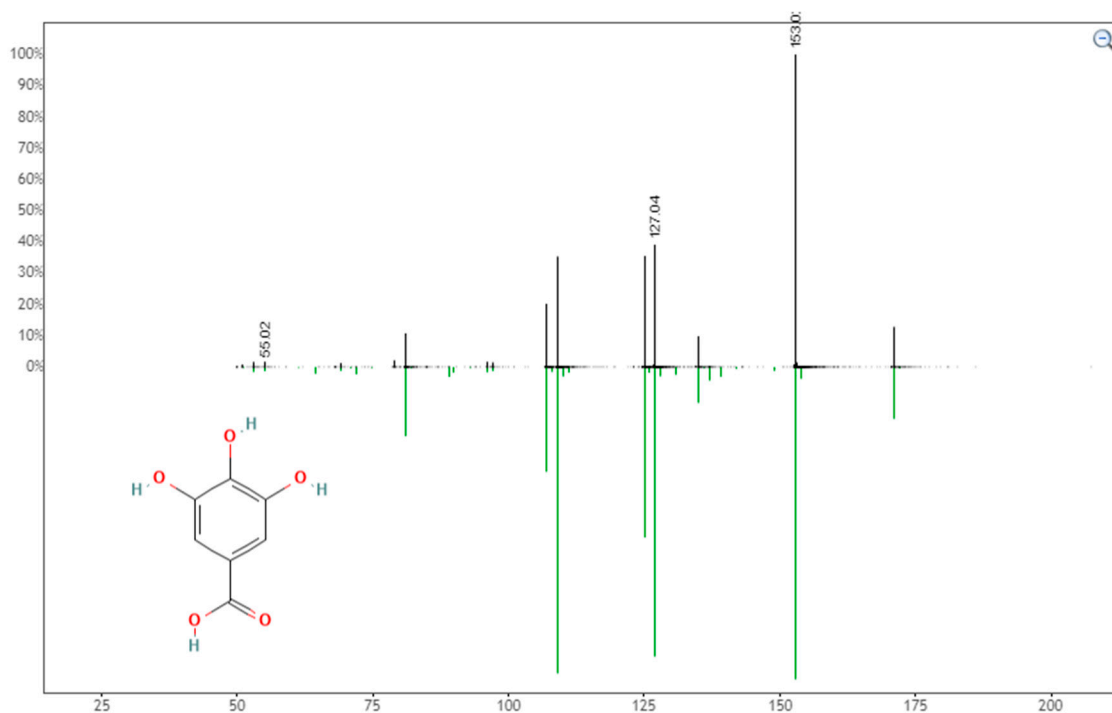

### 5\_-Deoxy-5\_-(methylsulfinyl)adenosine

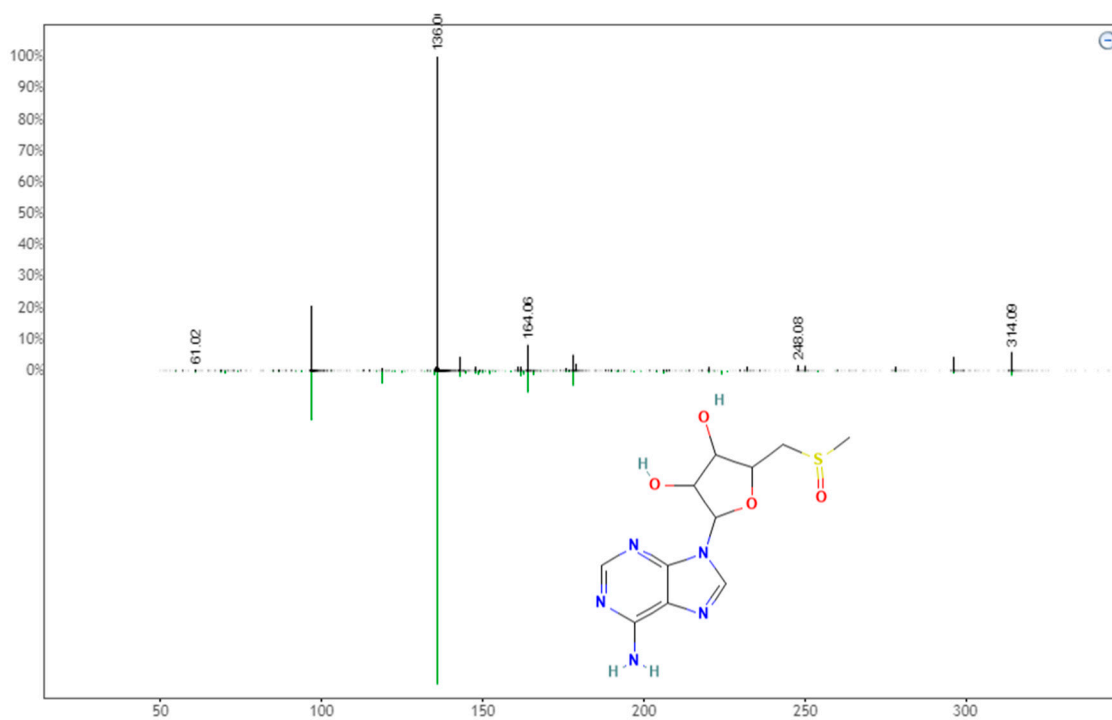

## Adenosine Monophosphate

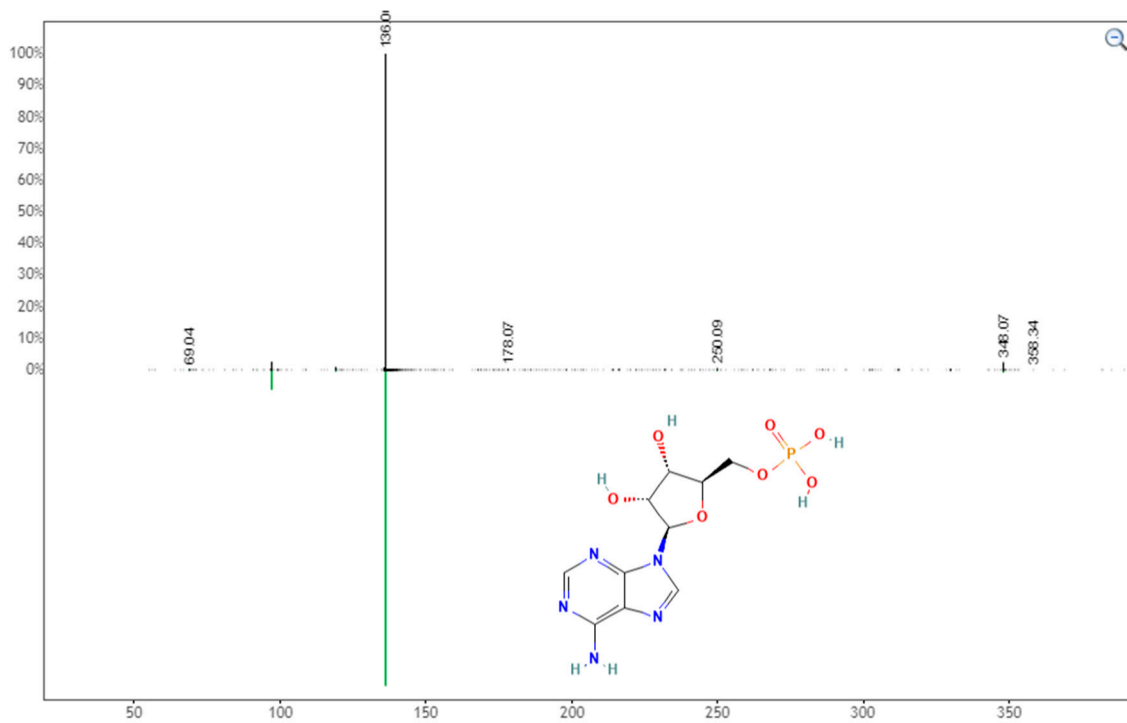

## Ellagic acid

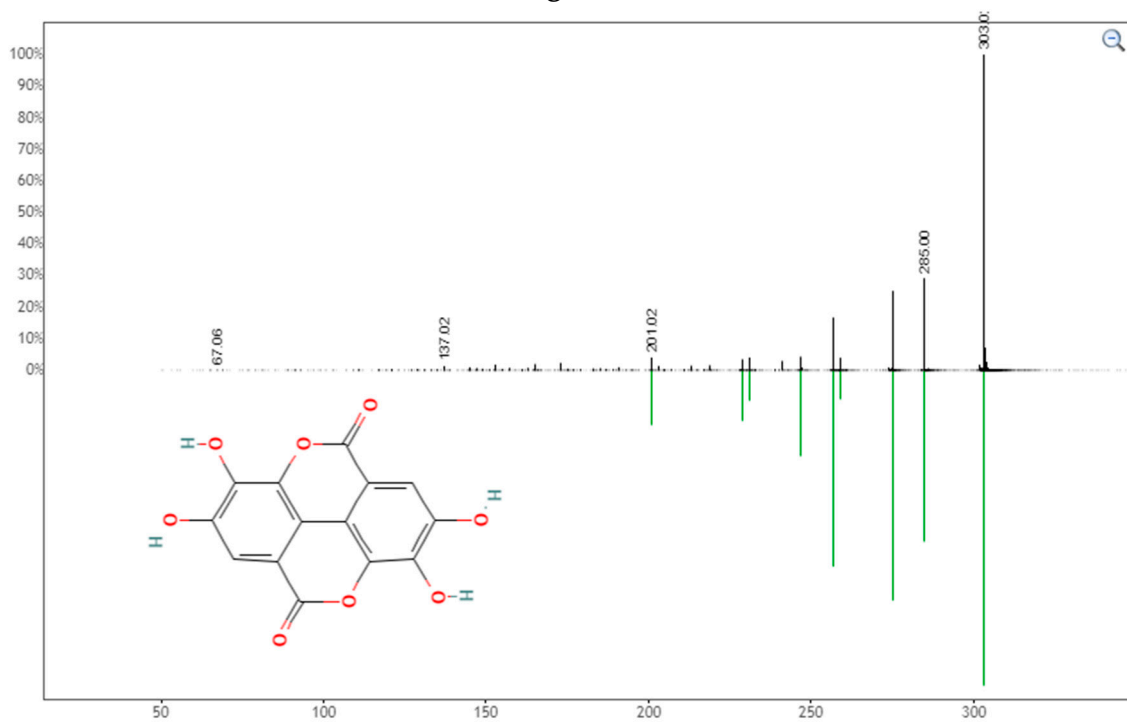

Comparison between library GNPS (bottom) and query spectra phytocomponents identified in **HELIR** (top). The structure of the phytocomponent identified is represented.

### DL-Indole-3-lactic acid

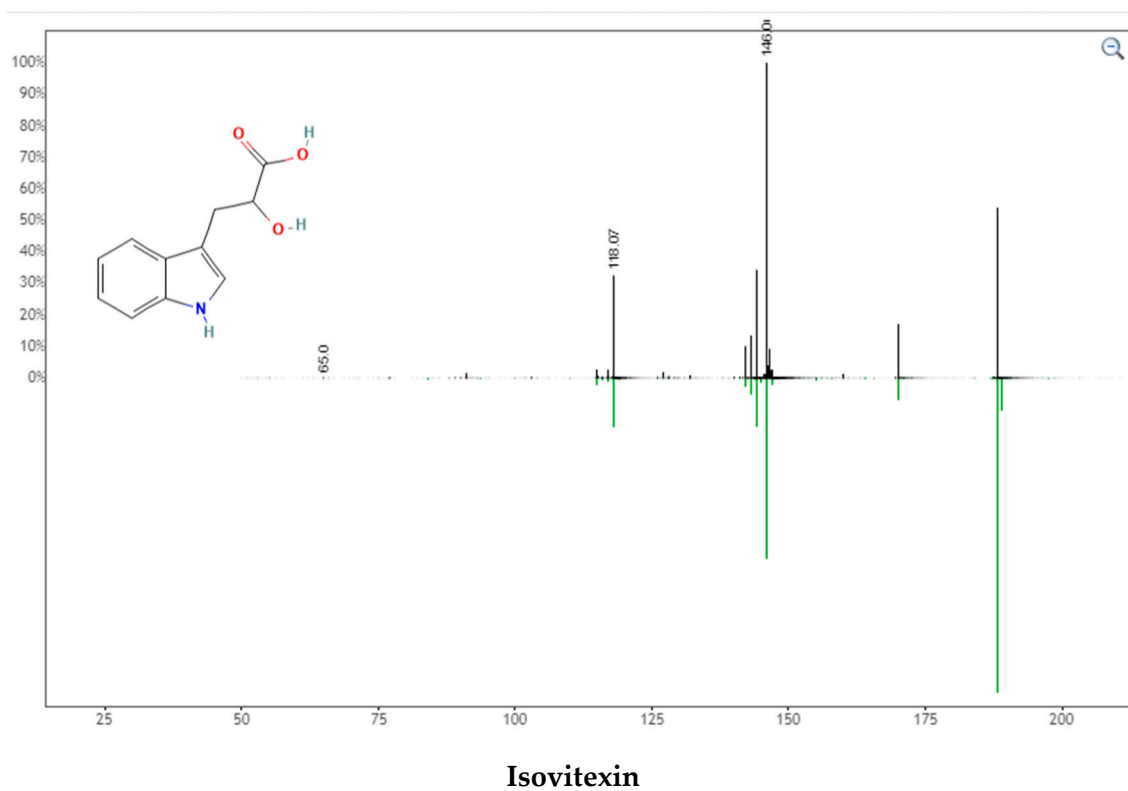

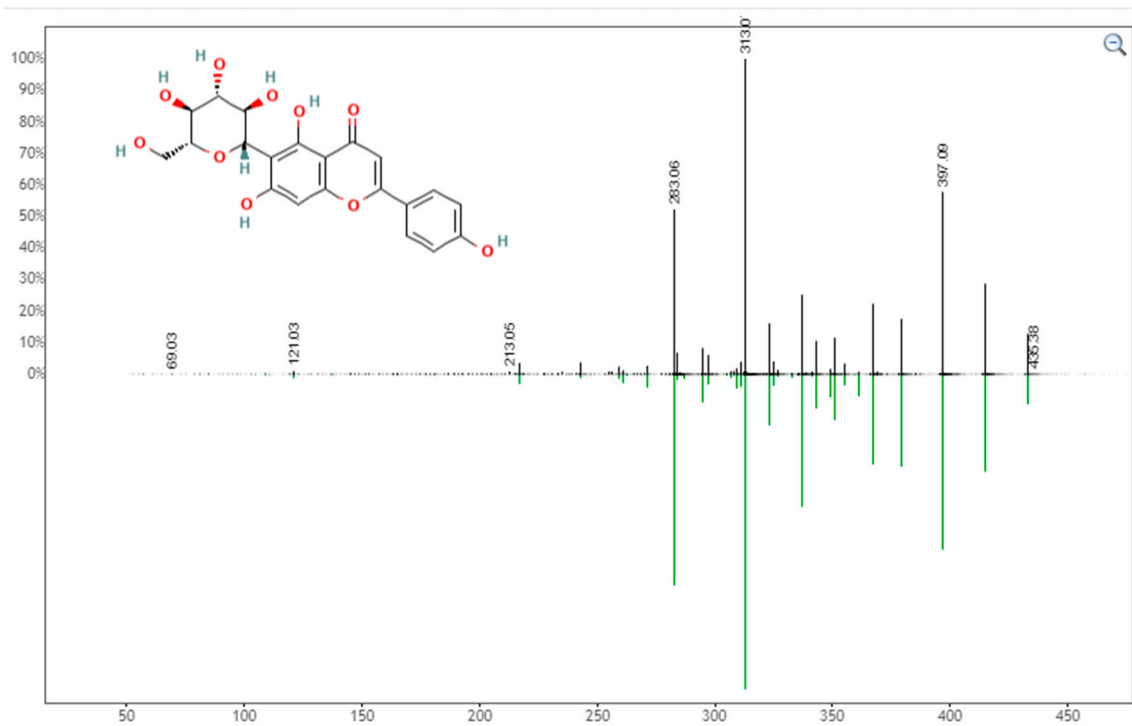

## 2,6-Xylidine

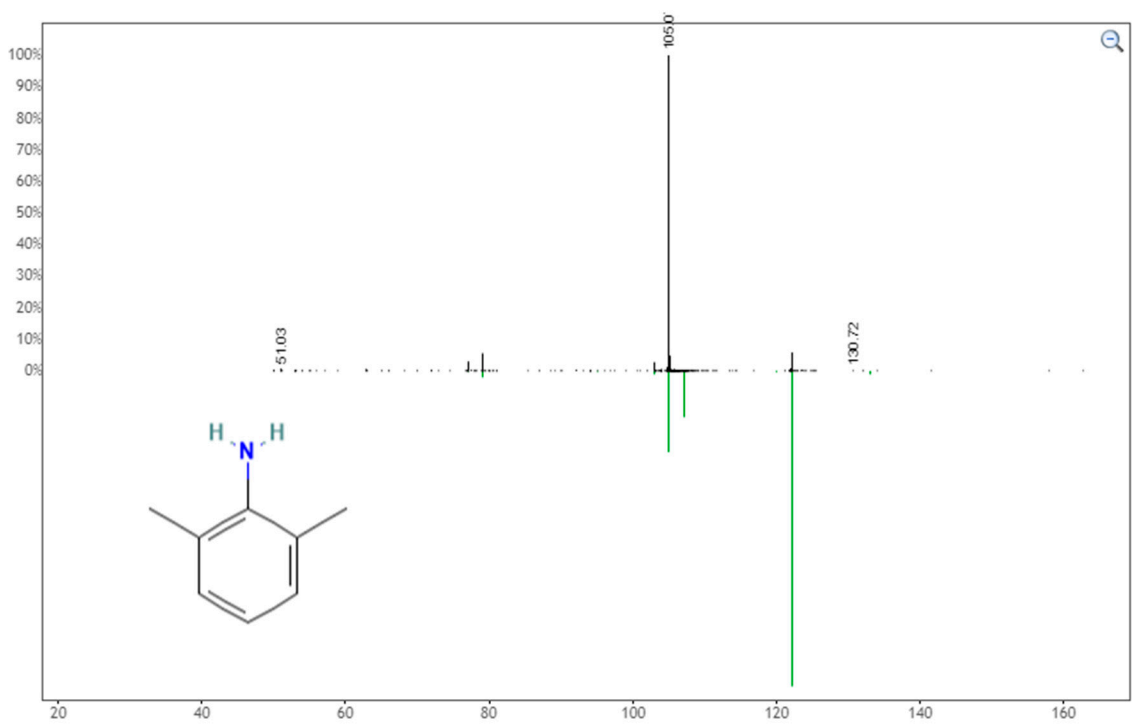

## Gallic acid

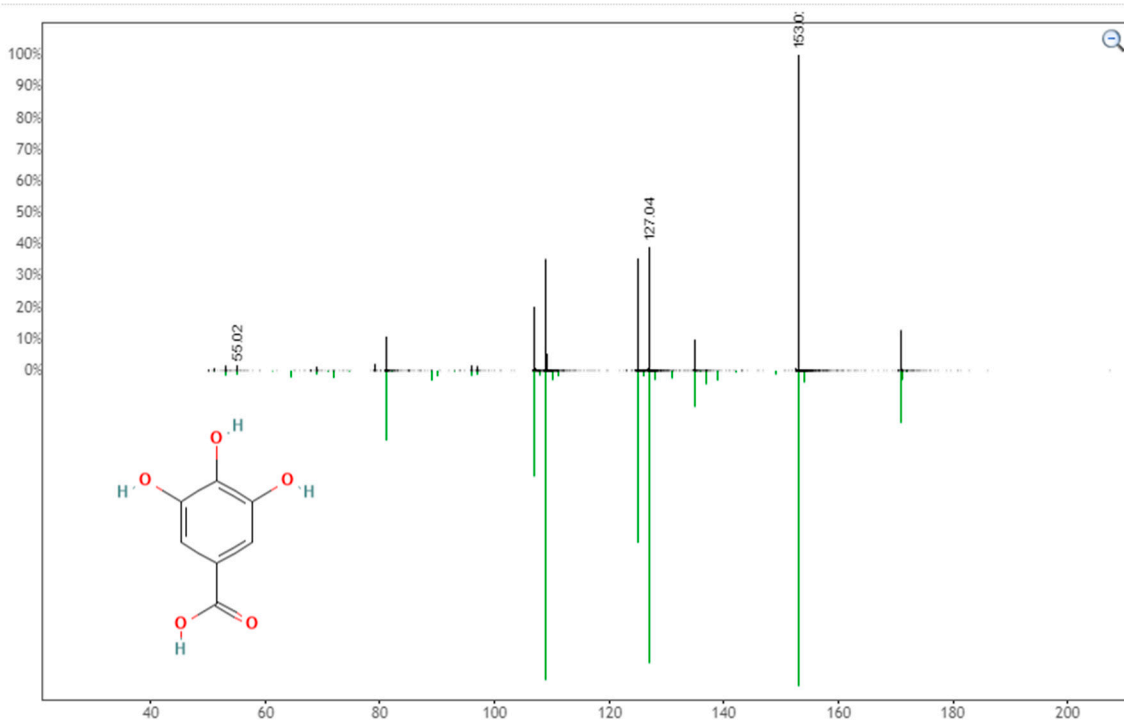

## Ferulate

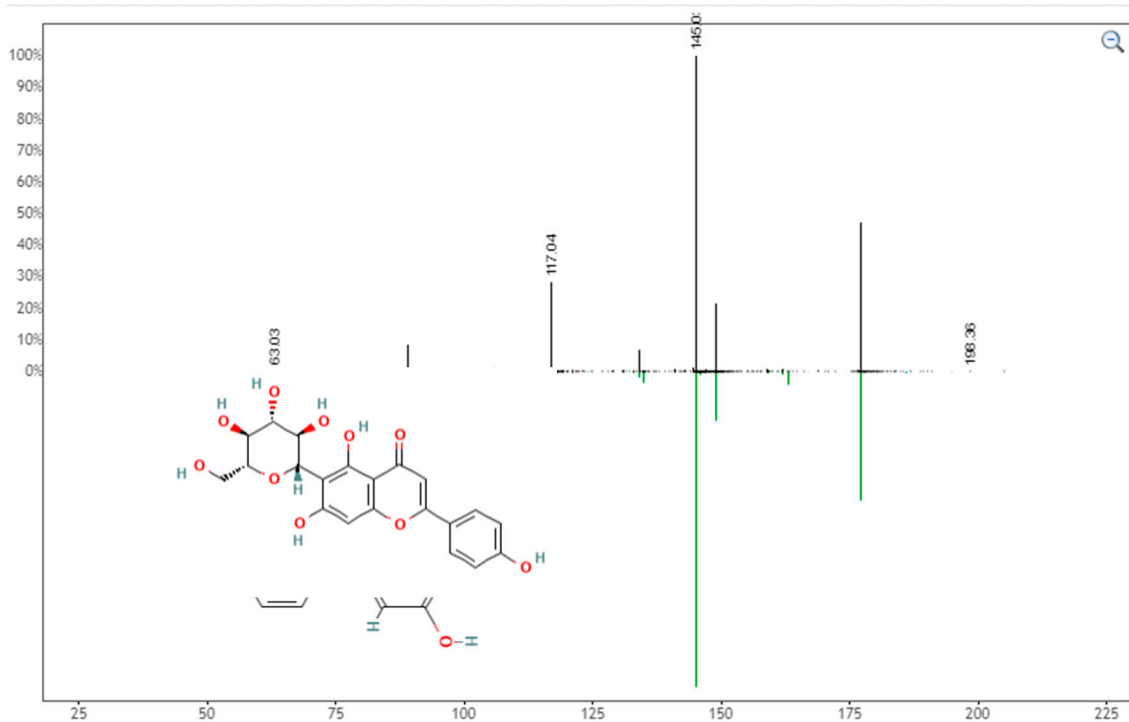

## Phenylalanine

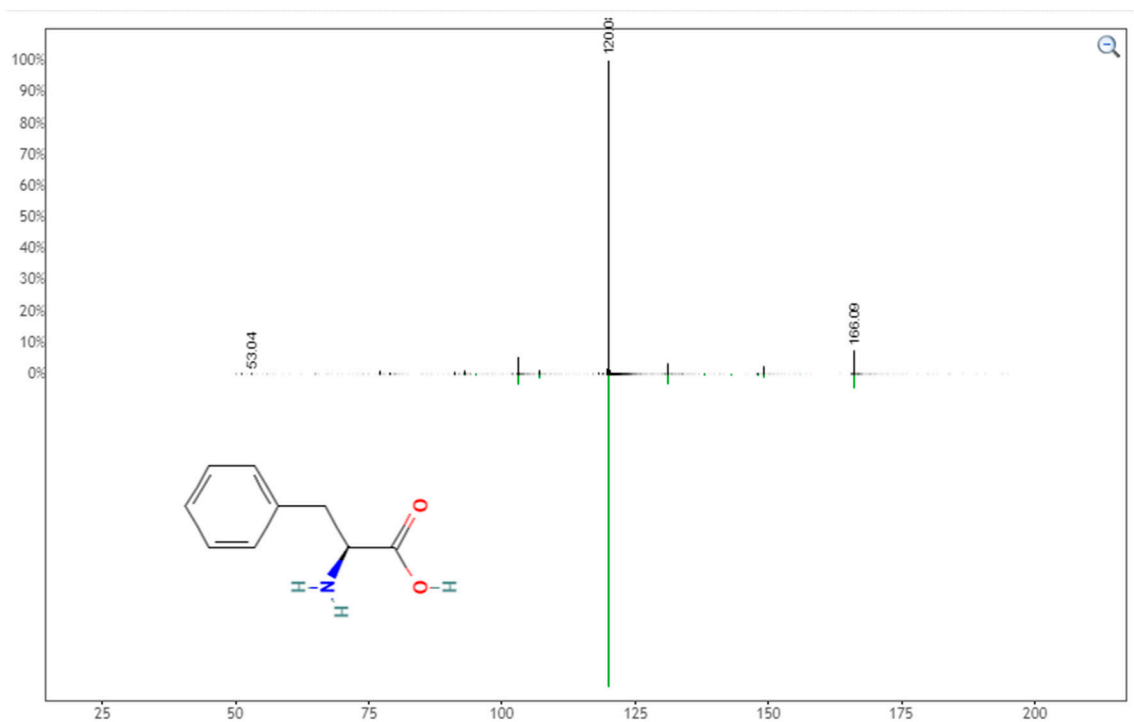

**Pheophorbide A**

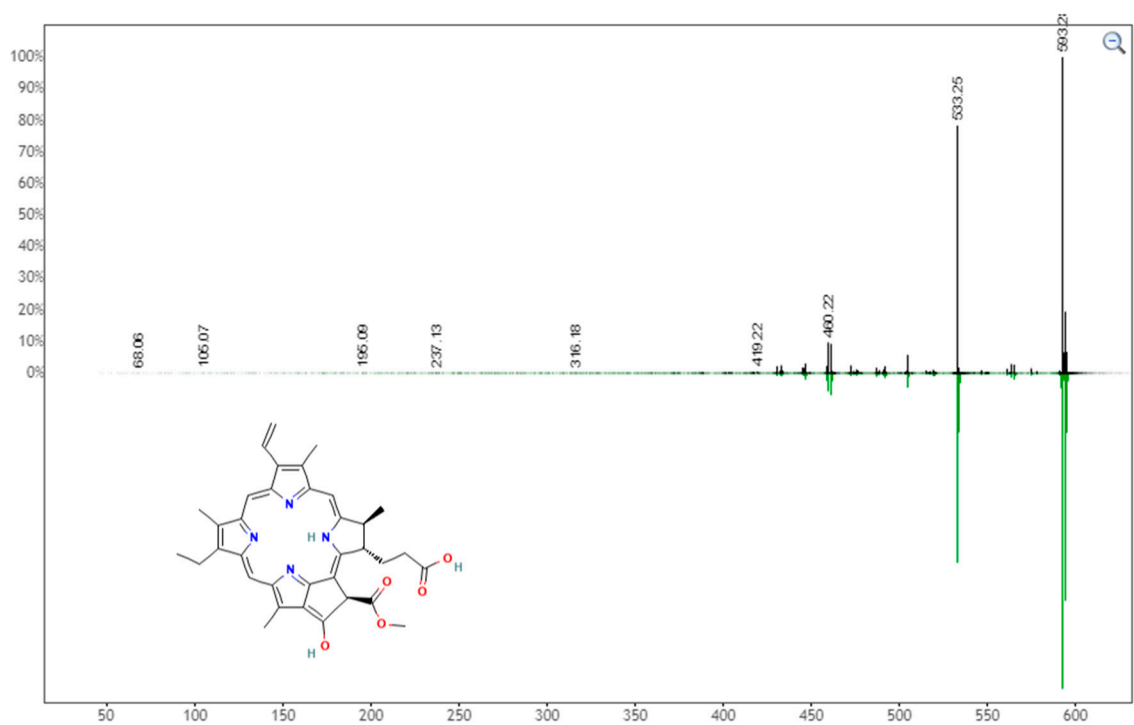

**4-AMINOBUTANOATE**

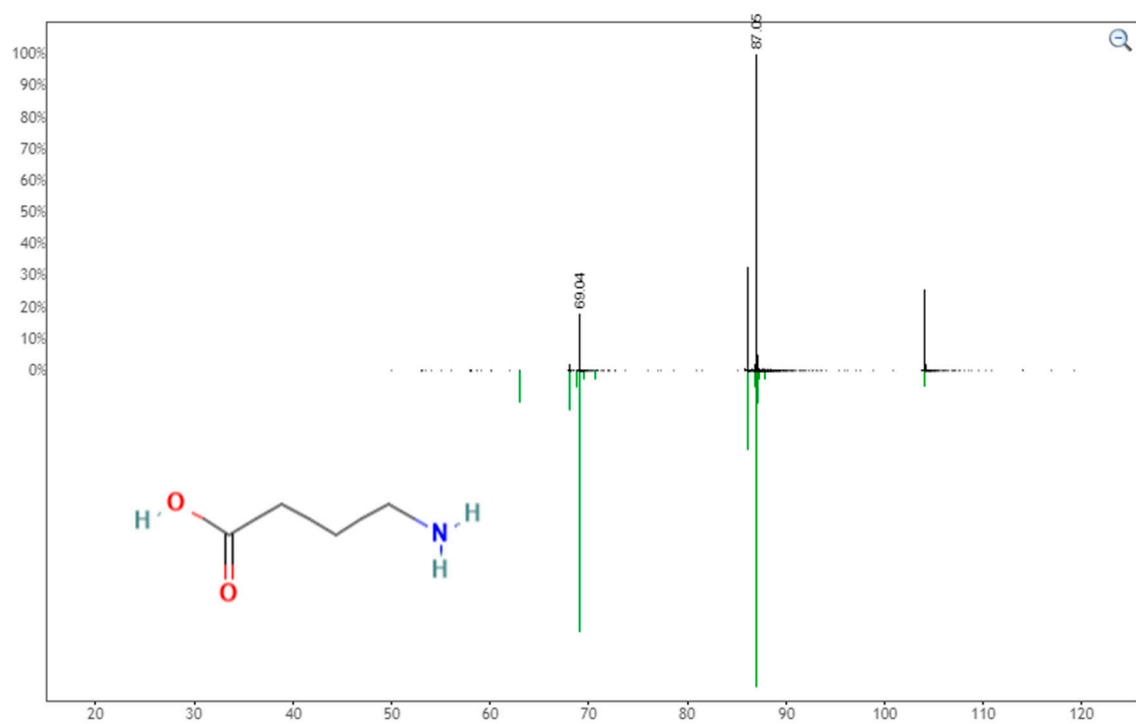

## Pyridoxine

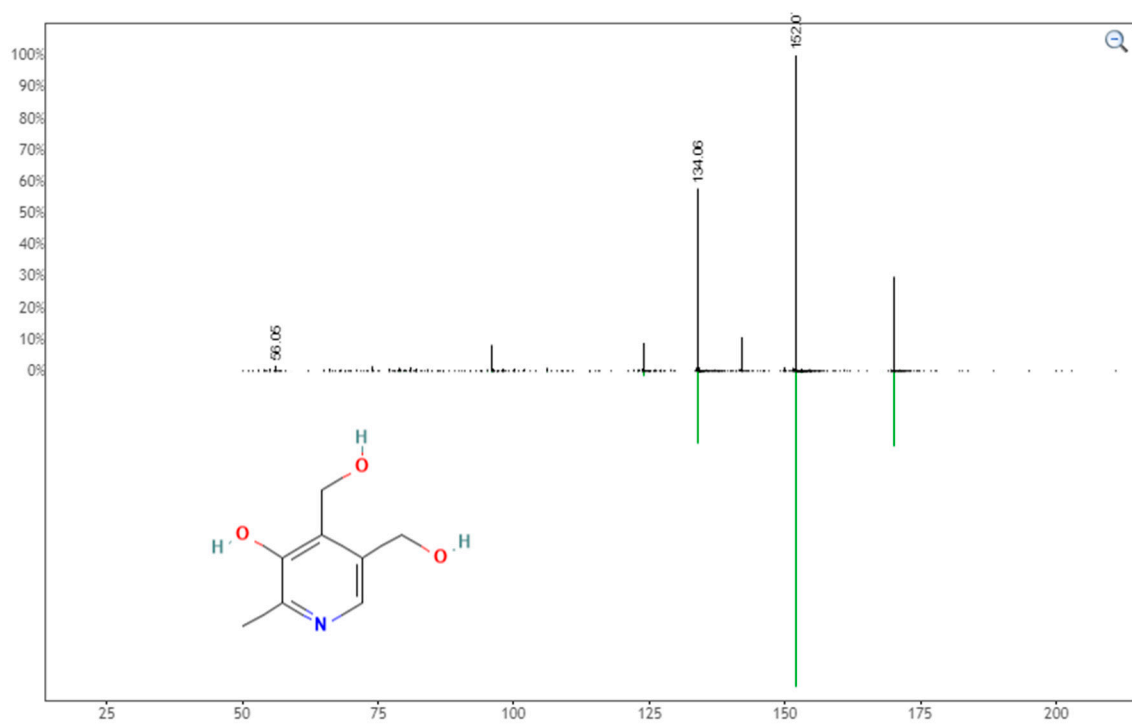

Supplement: s1 [file s1]
